# Supplementary material for: Buckling-induced structural transition during the drying of a polymeric latex droplet on a solid surface
Source: Royal Society of Chemistry journal article supplement (doi:10.1039/c2sm26580j), 2012-01-01
Supplement: c2sm26580j.pdf [file c2sm26580j.pdf]

## Supporting Information

# Buckling-Induced Structural Transition in Drying a Polymeric Latex Droplet at Solid Surface

Xuelian Chen, Volodymyr Boyko, Jens Rieger, Frank Reinhold, Bernd Reck, Jan Perlich, Rainer Gehrke, and Yongfeng Men\*

### **Brief description of GIFT** (Generalized Indirect Fourier Transformation)

For detailed information please see (J. Brunner-Popela and O. Glatter, *J. Appl. Cryst.*, 1997, 30, 431. and G. Fritz, A. Bergmann and O. Glatter, *J. Chem. Phys.*, 2000, 113, 9733.)

In treating scattering data from our dispersion which is charge stabilized colloidal particles, the interaction between particles are considered to have a Hypernetted chain closure (HNC) relation. The scattering intensity reads

$$I \propto P(q)S(q)$$

where  $P(q)$  and  $S(q)$  are form factor of individual particles and structure factor arising from the interaction between particles, respectively. For spherical particles with a radius of  $R$  like we have

$$P(q) \propto \frac{9(\sin(qR) - qR \cos(qR))^2}{(qR)^6} \quad \text{and}$$

$$S(q) = 1 + 4\pi n \int_0^\infty h(r)r^2 \frac{\sin(qr)}{qr} dr$$

Where  $h(r)$  is the Ornstein-Zernike equation and reads

$$h(r) = c(r) + n \int dr' c(r-r')h(r')$$

where the total correlation function  $h(r)$  is related to the direct correlation function between the particles  $c(r)$  and the indirect contributions, which are represented by the integral.  $r$  is the center to center distance of the spheres.

HNC closure relation reads:  $g(r) = e^{-\beta v(r) + h(r) - c(r)}$  with the pair distribution function  $g(r) = h(r) + 1$  and

$$\beta v(r) = \frac{Z^2 e_0^2}{4\pi\epsilon\epsilon_0 kT} \cdot \frac{e^{-\kappa(r-2R)}}{r(1+\kappa R)^2}$$

where  $v(r)$  is Yukawa potential,  $z$  is the number of unit electron charges on the particle,  $e_0$  is the charge of an electron,  $\epsilon_0$  is the permittivity of vacuum,  $\epsilon$  the relative dielectric constant,  $k$  the Boltzmann constant,  $T$  the temperature,  $R$  the radius of the spheres,  $\kappa$  the Debye screening parameter, which is determined by the ionic strength ( $I$ ).

$$\kappa = \sqrt{\frac{\epsilon\epsilon_0 kT}{2N_A e_0^2 I}} \quad \text{where}$$

$I = \frac{1}{2} \sum_{i=1}^n c_i z_i^2$  which depends on the concentrations  $c_i$  and charges  $z_i$  of all  $n$  different ions present in the solution.

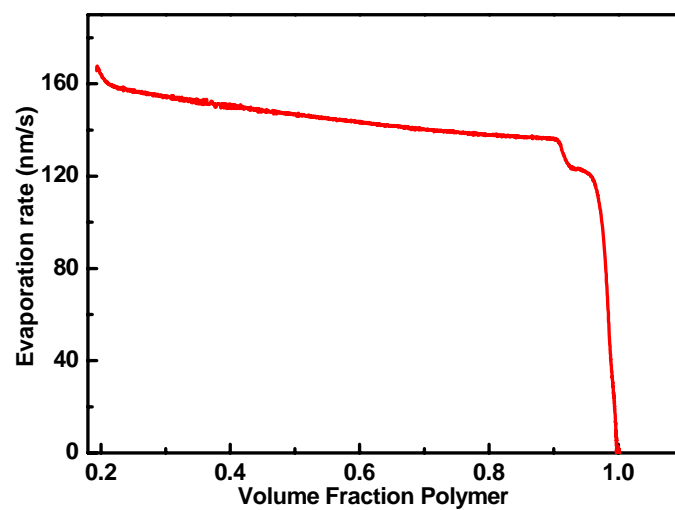

**Figure S1.** Evaporation rate of water in a latex droplet as a function of the volume fraction polymer.
